## Congratulations and Thank You: Announcing FAER President's Retirement

Roger A. Johns, MD, MHS, PhD

**A**s Chair of the FAER Board of Directors, it is my duty and privilege to share bittersweet, if exciting, news. James C. Eisenach, MD, has decided to retire as President of the Foundation for Anesthesia Education and Research (FAER) effective December 31, 2023.

Dr. Eisenach started his tenure with FAER in 2016, and through his astute leadership and guidance, FAER has excelled at its mission, remaining a leader in support of anesthesiology research and new investigator development. Jim's leadership was key to the creation of the FAER Mentored Research Training Grant annual meeting, as well as the development of co-sponsored grants with the American Board of Anesthesiology, Anesthesia Patient Safety Foundation, Society for Obstetric Anesthesia and

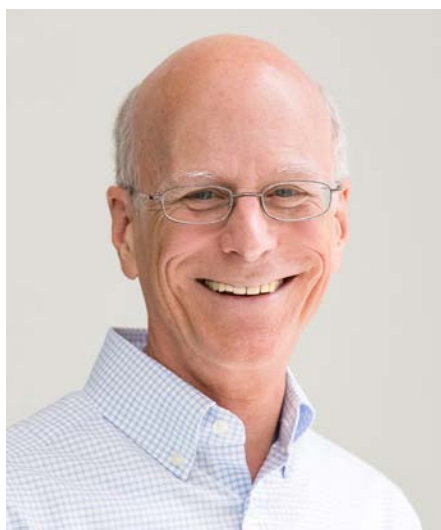

James C. Eisenach, MD, FAER President 2016-2023, FM James III, Professor of Anesthesiology, Wake Forest School of Medicine, Winston-Salem, North Carolina.

Perinatology, and the American Heart Association, to name only a few.

Jim also played a critical role in the establishment of a new fellowship at the National Academy of Medicine for early-career anesthesiology scholars. FAER could not have asked for a better leader and steward of FAER's mission. His commitment to developing the next generation of physician-investigators is unparalleled. When looking at his time with FAER, Jim said, "It has been an honor to serve FAER. I can't wait to see how much FAER will continue to impact our profession in the coming years."

Having been on the Board of Directors for most of Jim's tenure and having worked closely with him over these past two years as the FAER Board Chair, I can personally attest to his passion for and dedication to

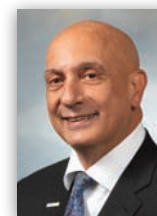

**Roger A. Johns, MD, MHS, PhD**  
Chair, FAER Board of Directors, and Professor of Anesthesiology and Critical Care Medicine, Johns Hopkins Medicine, Baltimore, Maryland.

FAER and its mission. Jim's influence on FAER – and on the lives and careers of our grantees – has helped secure our future. Thank you, Jim, for your invaluable leadership. Congratulations on a job well done!

More information and a timeline for the search for a new FAER President will be announced soon. In the meantime, please join me in thanking and celebrating Jim for all his hard work and dedication. ■
